# Supplementary material for: Identification of Putative Neuropeptides That Alter the Behaviour of Schistosoma mansoni Cercariae
Source: MDPI journal article supplement (doi:10.3390/biology11091344), 2022-09-12
Supplement: s1 [file s1]

# Identification of Putative Neuropeptides that Alter the Behaviour of *Schistosoma mansoni* Cercariae

Conor E. Fogarty et al.

**File S1.** Comparative sequence analysis of all precursor proteins identified in this study.

## Alignment of Cercariae neuropeptide

### Method

Annotation of putative *S. mansoni* neuropeptides was performed by BLASTp search against non-redundant protein database, NCBI (May, 21<sup>st</sup> 2020). Homologous proteins match with *S. mansoni* neuropeptides with  $E\text{-value} \leq 0.5$  were retrieved from NCBI and used for multiple sequence alignment. Amino acid alignment was generated using MEGA X software (version 10.1.8) (Kumar, Stecher et al. 2018) with parameter set as follows: algorithm, ClustalW; gap opening penalty, 10; gap extension penalty, 0.2. Visualization of alignment was carried out on TeXworks software. Sequence logo was generated by using WebLogo application (Crooks et al., 2004).

**Table 1. Species and species abbreviations used in the alignments.**

| Species                            | Species abbreviation     |
|------------------------------------|--------------------------|
| <i>Clonorchis sinensis</i>         | <i>C. sinensis</i>       |
| <i>Dugesia japonica</i>            | <i>D. japonica</i>       |
| <i>Echinococcus granulosus</i>     | <i>E. granulosus</i>     |
| <i>Echinococcus multilocularis</i> | <i>E. multilocularis</i> |
| <i>Echinostoma caproni</i>         | <i>E. caproni</i>        |
| <i>Fasciola gigantica</i>          | <i>F. gigantica</i>      |
| <i>Fasciola hepatica</i>           | <i>F. hepatica</i>       |
| <i>Fasciolopsis buski</i>          | <i>F. buski</i>          |
| <i>Macrostomum lignano</i>         | <i>M. lignano</i>        |
| <i>Mesocostoides corti</i>         | <i>M. corti</i>          |
| <i>Opisthorchis felinus</i>        | <i>O. felinus</i>        |
| <i>Opisthorchis viverrini</i>      | <i>O. viverrini</i>      |
| <i>Paragonimus westermani</i>      | <i>P. westermani</i>     |
| <i>Schistosoma bovis</i>           | <i>S. bovis</i>          |
| <i>Schistosoma curassoni</i>       | <i>S. curassoni</i>      |
| <i>Schistosoma haematobium</i>     | <i>S. haematobium</i>    |
| <i>Schistosoma japonicum</i>       | <i>S. japonicum</i>      |
| <i>Schistosoma mansoni</i>         | <i>S. mansoni</i>        |
| <i>Schistosoma margrebowiei</i>    | <i>S. margrebowiei</i>   |
| <i>Schistosoma mattheei</i>        | <i>S. mattheei</i>       |
| <i>Schmidtea mediterranea</i>      | <i>Sch. mediterranea</i> |
| <i>Trichobilharzia regenti</i>     | <i>T. regenti</i>        |

Npp-1

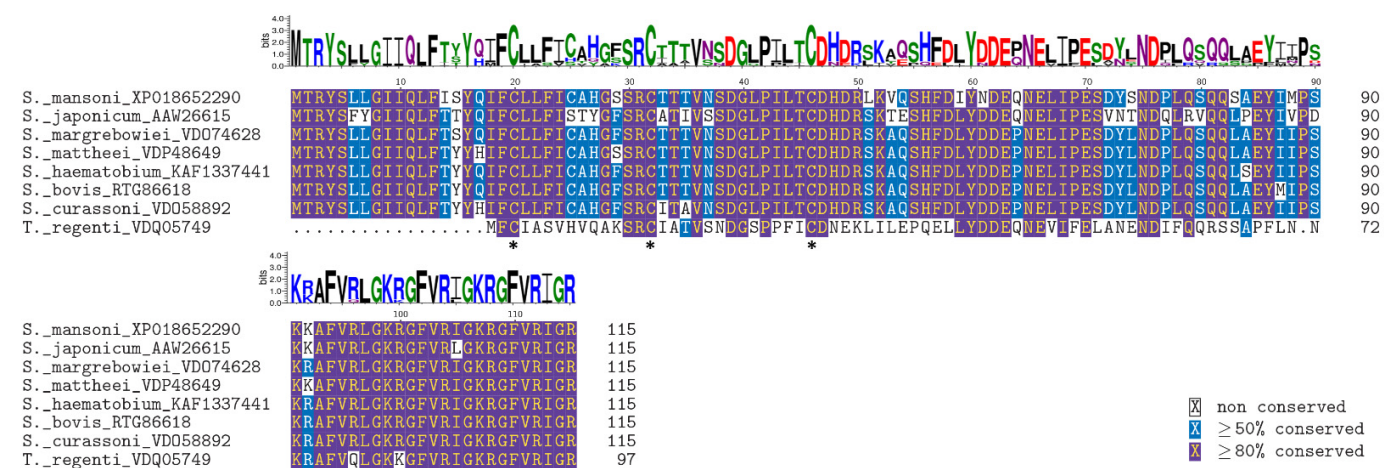

Npp-5

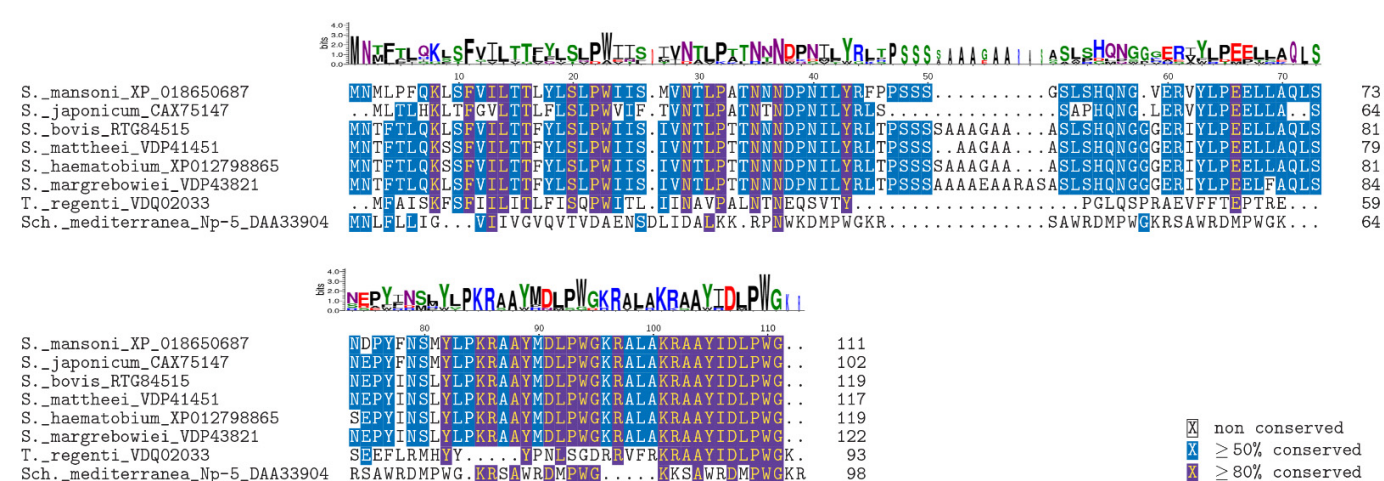

Npp-14

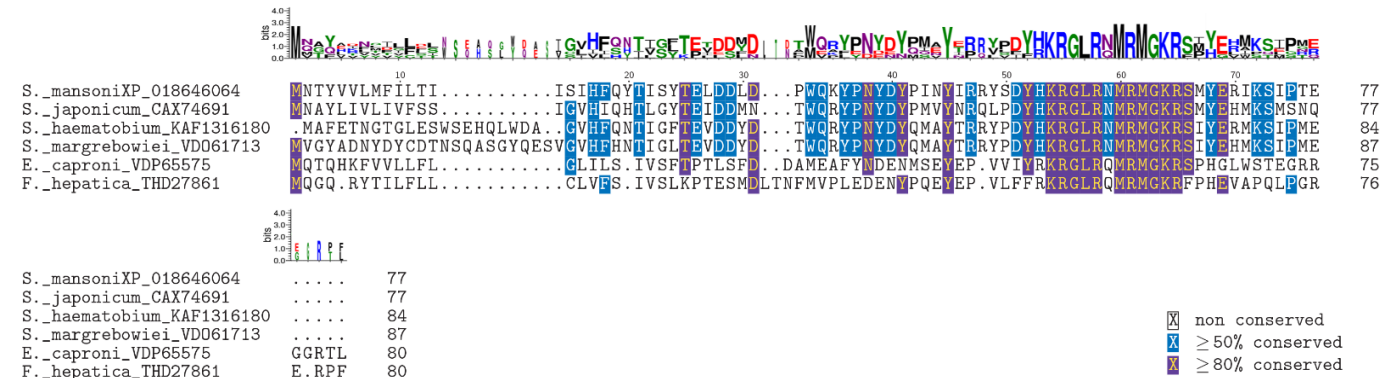

Npp-17

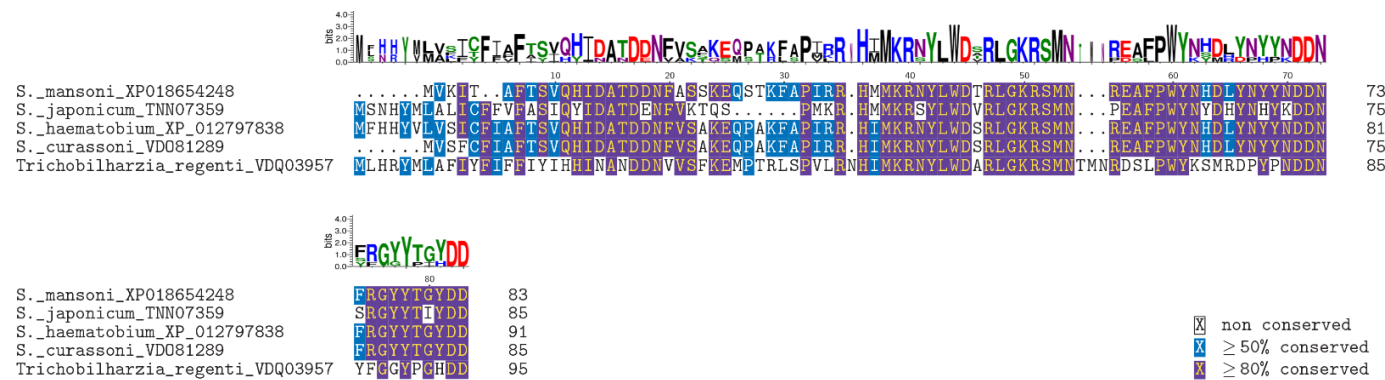

Npp-26

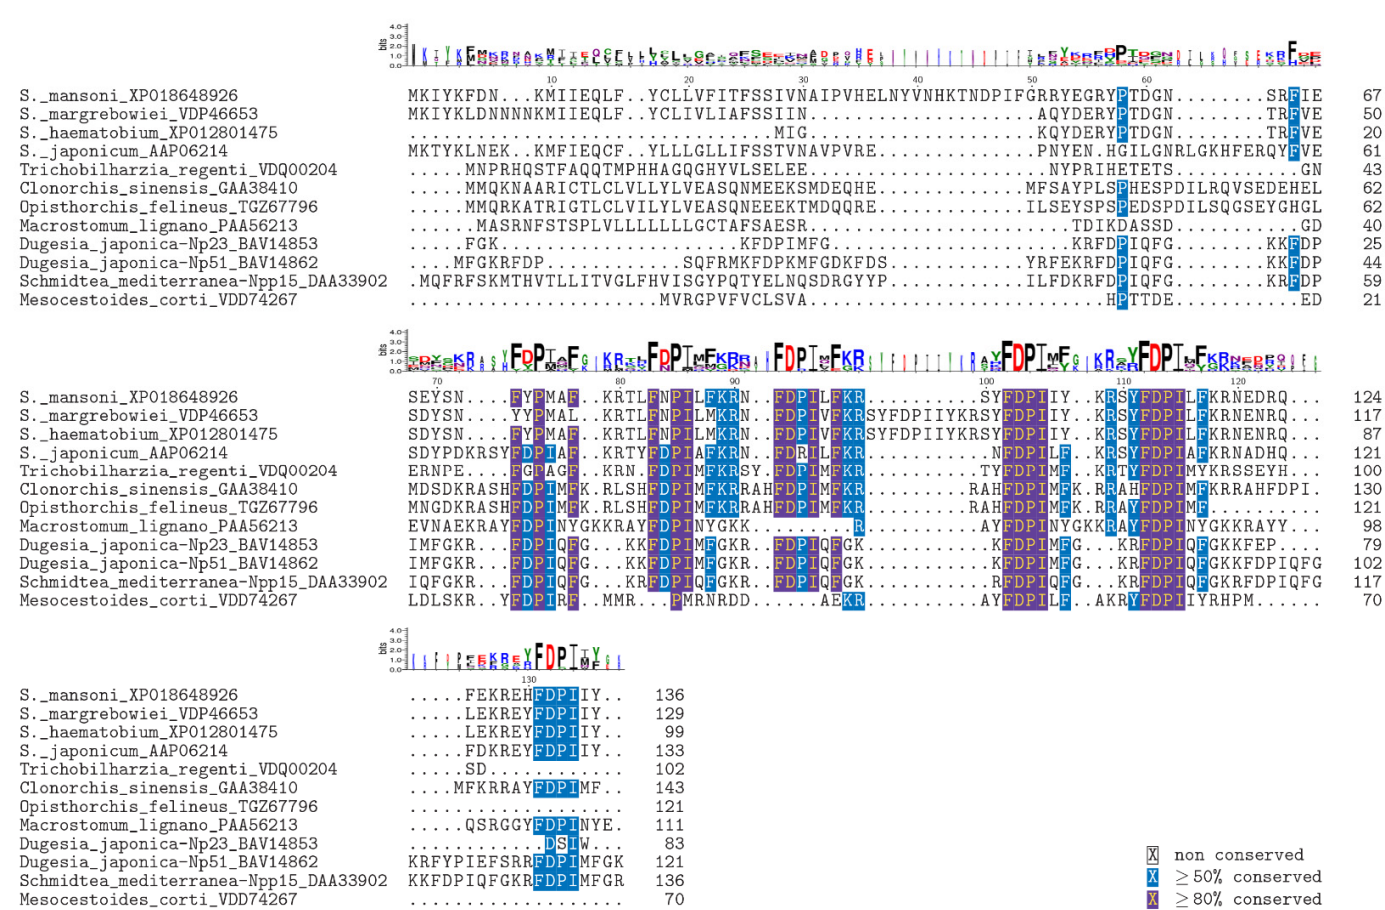



Npp-30

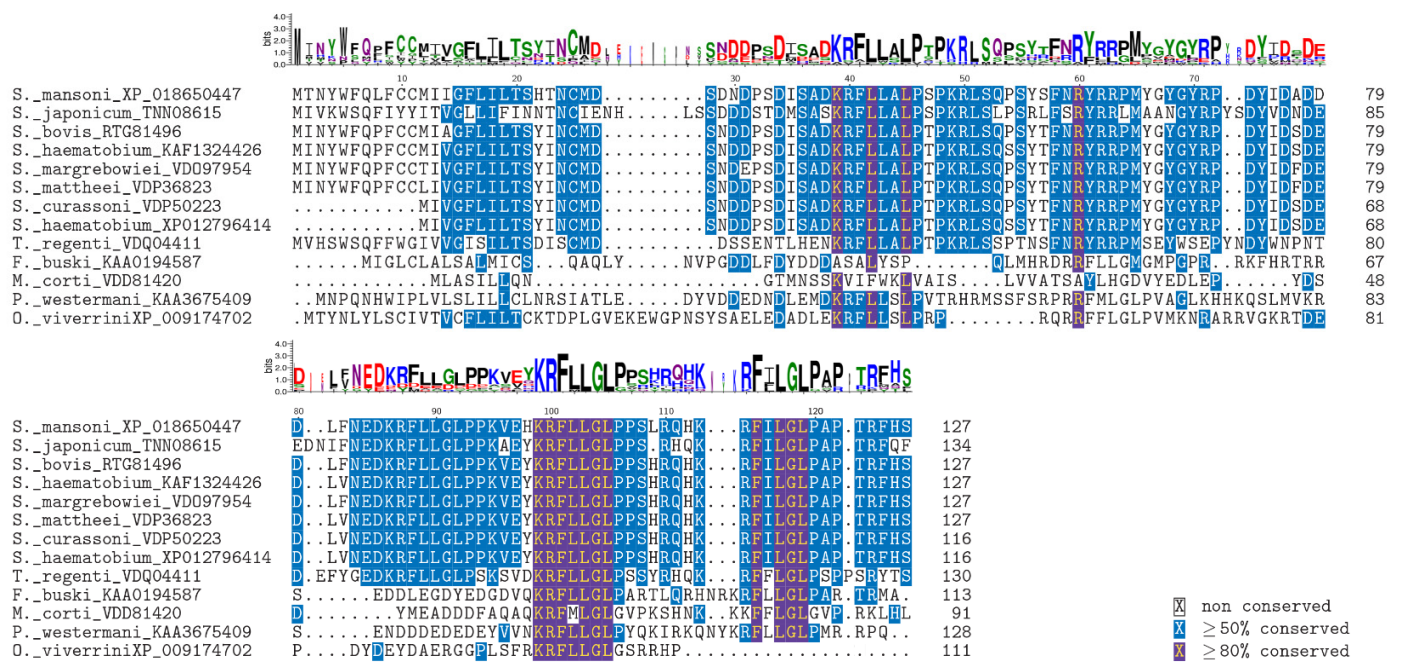

Npp-31

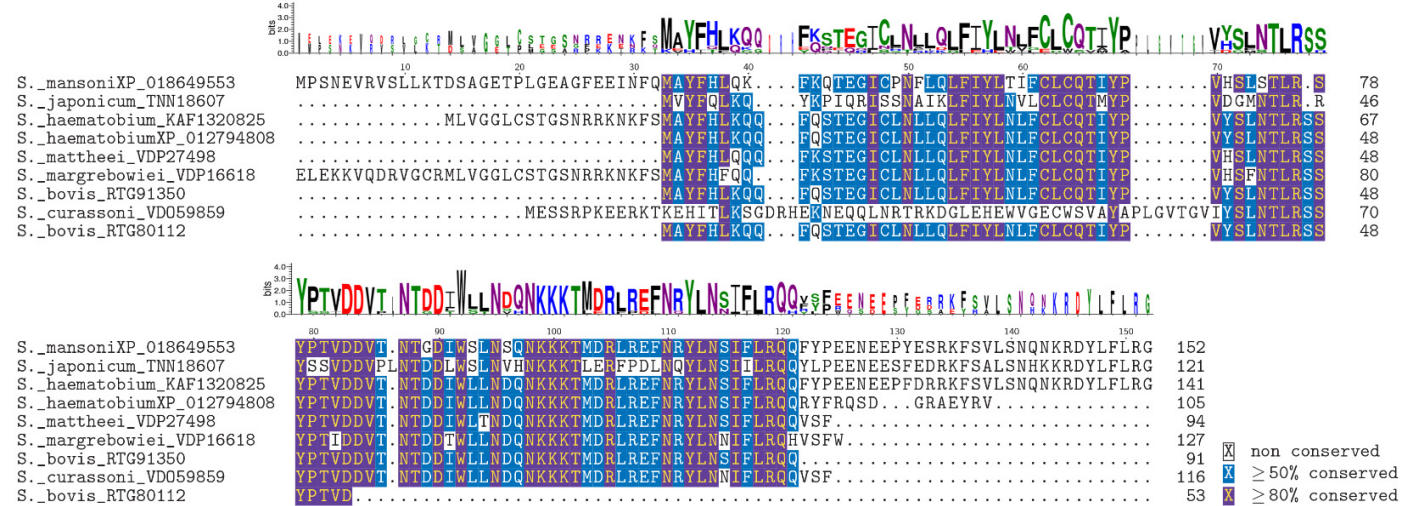

Npp-32

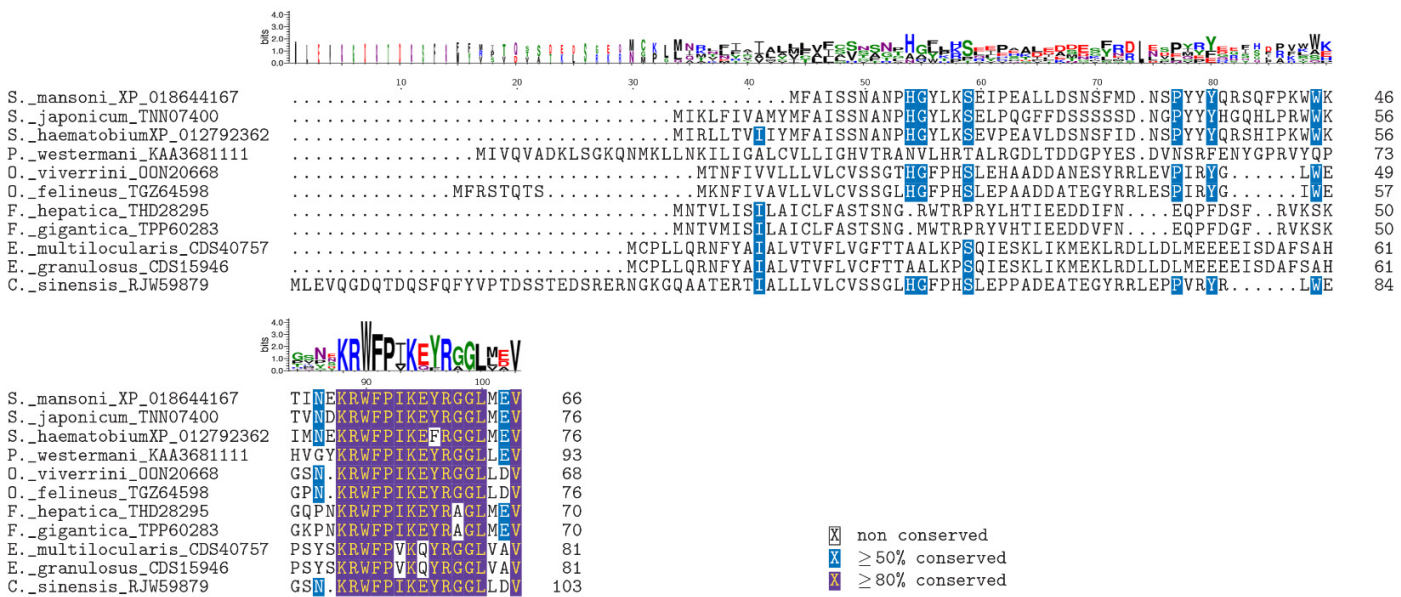

Npp-33

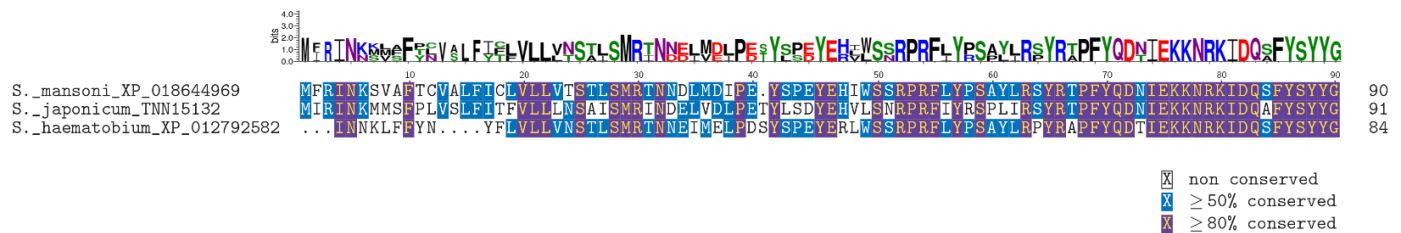

Npp-34

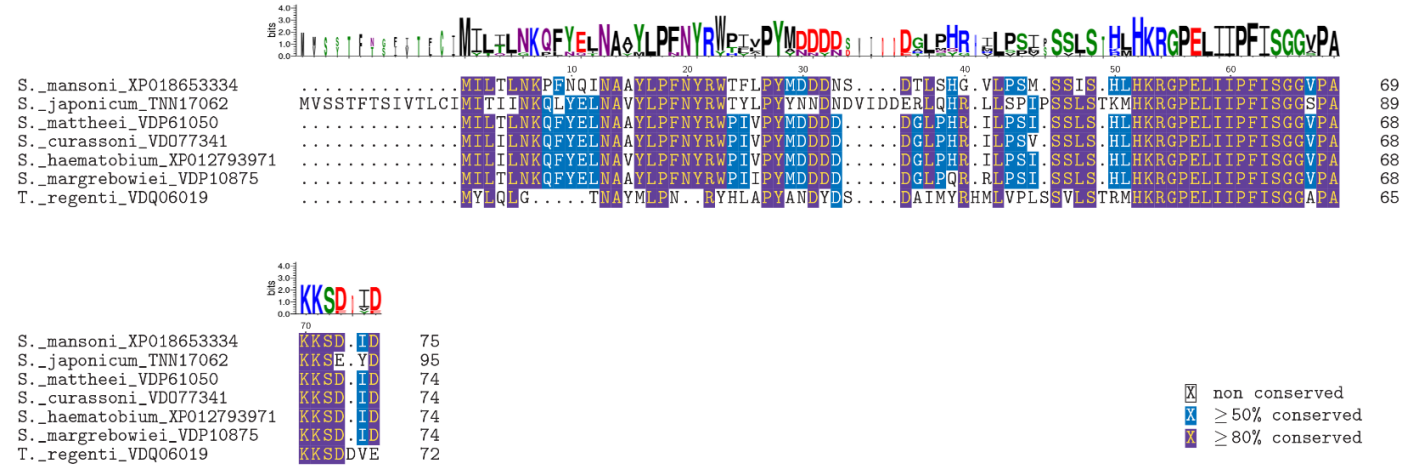



Npp-35

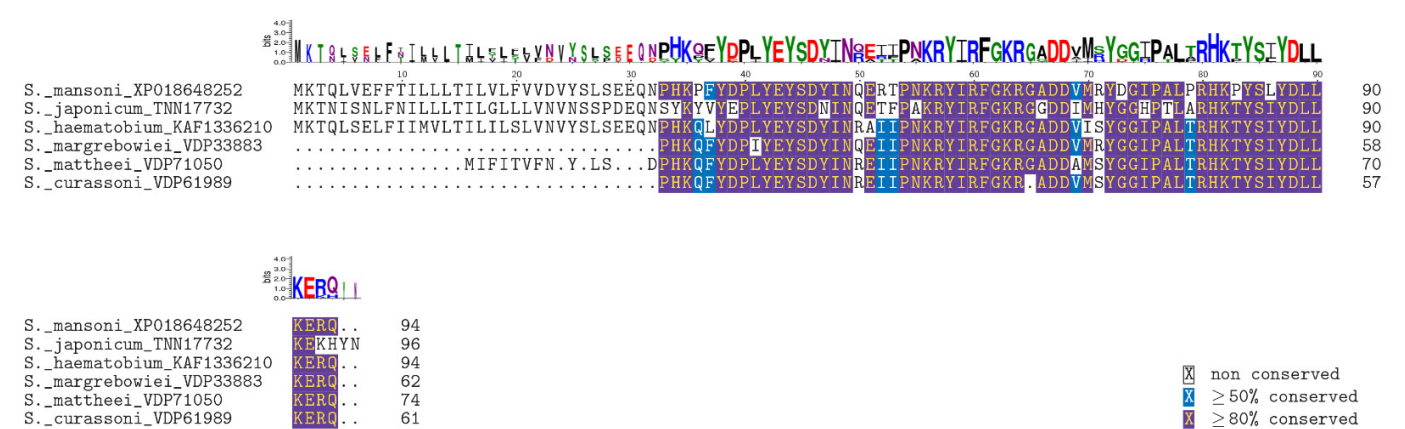

Npp-36

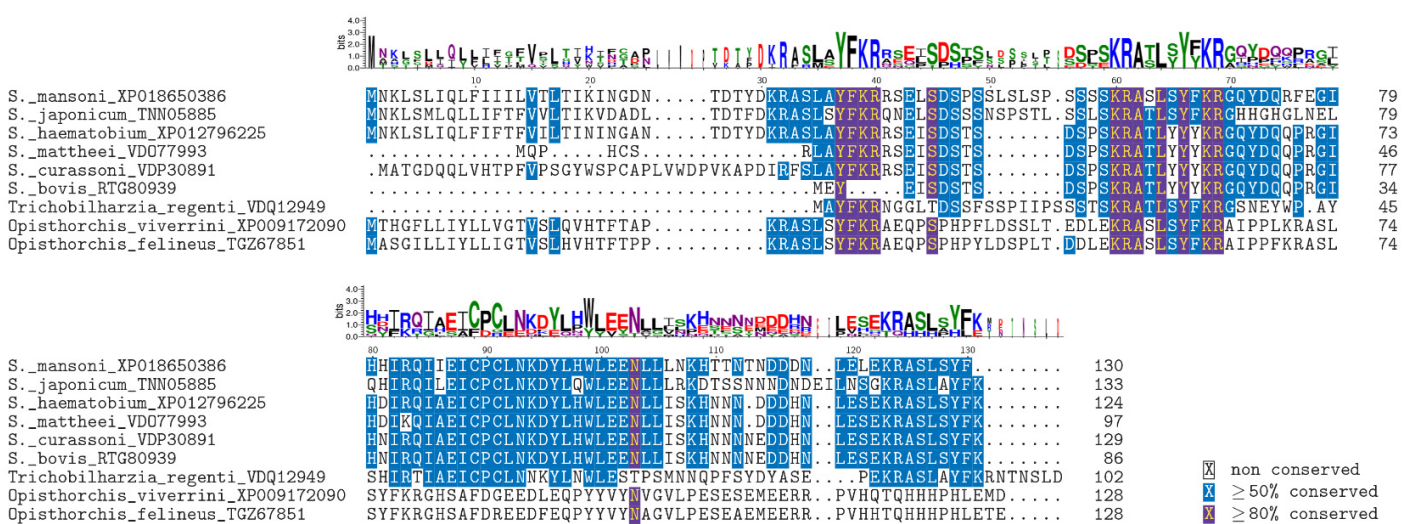

Npp-37

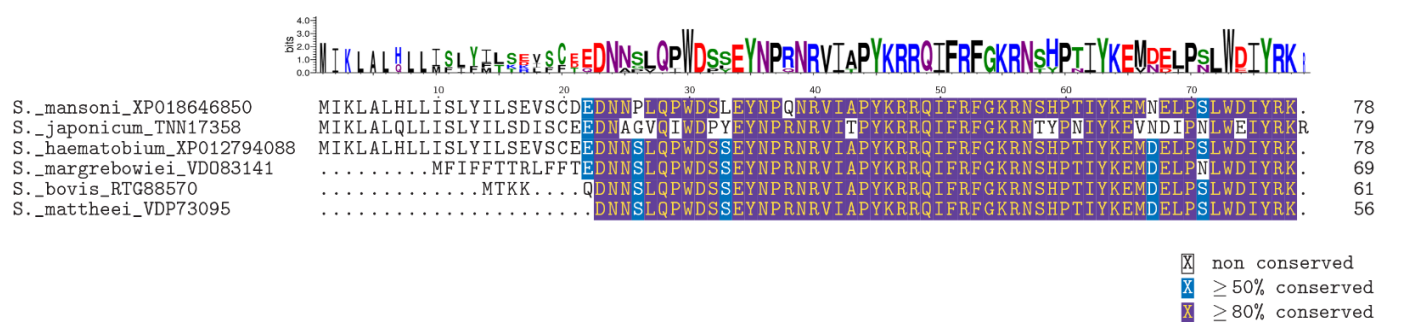

Npp-38

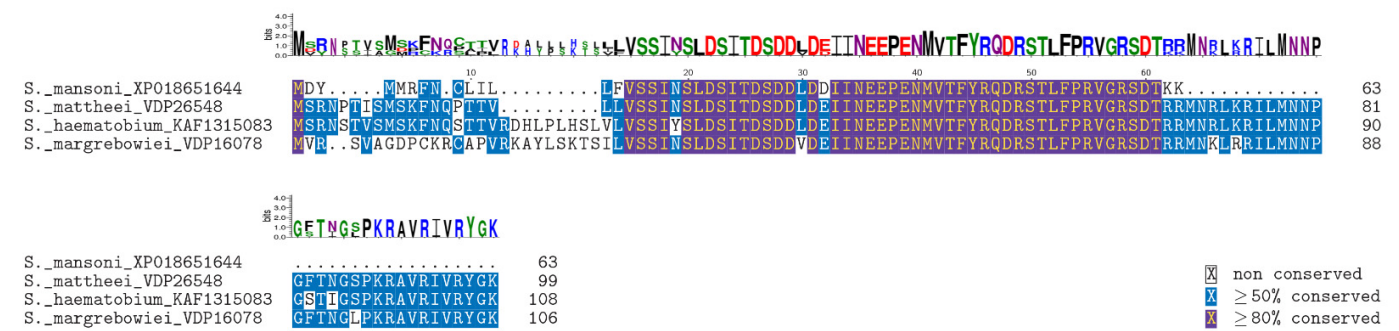

Npp-39

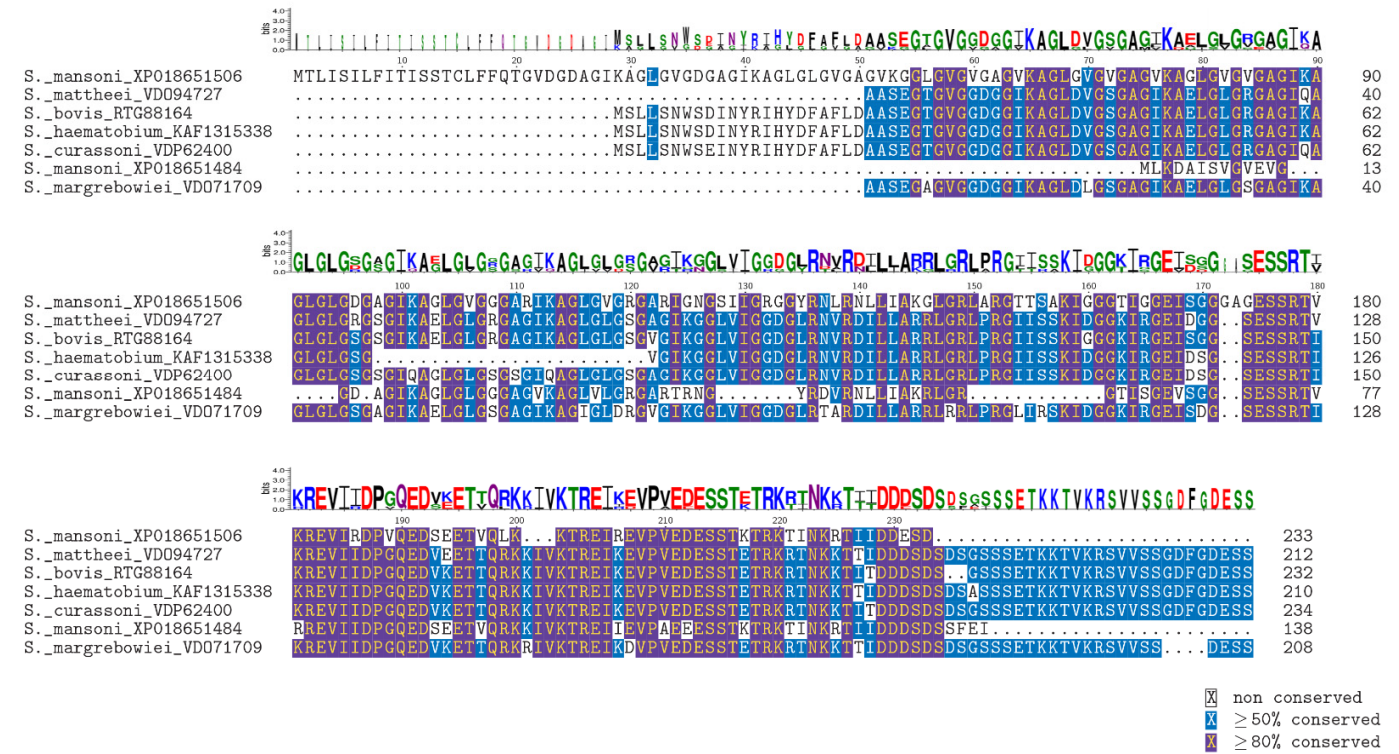

## Npp-40

|                                  |                                                                                               |     |
|----------------------------------|-----------------------------------------------------------------------------------------------|-----|
| <i>S. mansoni</i> _XP018647716   | .....MHKYYHYNLCSTKHKHLFTL.....TIVVICTILCINSESLDDSSLLIDFPCCGPHPIDMFLSKLFDYLEKQETPIMD.TSEIDEKL  | 79  |
| <i>S. bovis</i> _RTG82020        | .....MRKYHHYNLFRSKKYISIF.....TIYVICNILECINGELLDDSSLLIDFPCCGPHPIDMFLSKLFDYLEKQETPVME.SNEIDEKL  | 79  |
| <i>S. curassoni</i> _VDP60786    | .....MRKYHHYNLFRSKKYISIF.....TIYVICNILECINGELLDDSSLLIDFPCCGPHPIDMFLSKLFDYLEKQETPIME.SNEIDEKL  | 79  |
| <i>S. margrebowiei</i> _VDP37047 | .....MRKYHHYNLFRSKKYISIF.....TIYVICNILECINGELLDDSSLLIDFPCCGPHPIDMFLSKLFDYLEKQETPIMETSNEIDEKL  | 80  |
| <i>S. mattheei</i> _VDP61556     | .....MHKYYHYNLFRRSKNYISIF.....TIYVICNILECINGELLDDSSLLIDFPCCGPHPIDMFLSKLFDYLEKQETPIME.SNEIDEKL | 79  |
| <i>S. japonicum</i> _AAW25535    | .....MQNSHQL.....KNNISITL.....TIYLLWTILCINAEPLDDSTLIIDFPCCGPHPIDMFLSKLFDYLEKQETPFIE.SNEIDEKL  | 74  |
| <i>F. gigantica</i> _TPP64183    | .....MVLSTISDEDRSSFAF.....GRWPFRTRRSEVVN.....EDPKALDRPEQDCGLHPVDIFLTRLFDETERKQPVAAM...SSYEPG  | 75  |
| <i>F. hepatica</i> _THD24767     | .....MVLSTISDEDRSSFAF.....GRSPFRTRRSEVVN.....EDPKGLDRPEQDCGLHPVDIFLTRLFDETERKQPVAAM...SPYEPG  | 75  |
| <i>E. caproni</i> _VDP72327      | .....MSPLALSDDERDSFAL.....GRLRTRRRAR.....N.HVSNERERPEQDCGLHPMDIFLARLFDETERKQSETLL...SPNQPT    | 73  |
| <i>O. felineus</i> _TGZ61379     | MVWPPTYTRPFSLLRFFCGLYILCVLHVSIVMASPPYLESYTPRFHLKKSVLDTTENQRCGPHPIDLYLTELTQMEQNGSNIS.....      | 86  |
| <i>O. viverrini</i> _XP009166596 | .....MASPHLGSYTPRFHMEKKSVLDTTENQRCGPHPIDLYLTELTQMEQNGSNSLS.....                               | 54  |
| <i>S. mansoni</i> _XP018647716   | HIKMIYVKLLYAFTMPKSSYYVYNEIMRSINCHNECMSKQPRLLKKWLKRRNFLQNVNTIVRPNLNTDKSTYKH                    | 153 |
| <i>S. bovis</i> _RTG82020        | HIKMIYAKLLYAFTMPKSSYYVYNEIMRSINCHNECMSKQPRLLKKWLKRRNFLQNVNTIVRP..NTDKLNFKQ                    | 151 |
| <i>S. curassoni</i> _VDP60786    | HIKMIYAKLLYAFTMPKSSYYVYNEIMRSINCHNECMSKQPRLLKKWLKRRNFLQNVNTIVRP..NTDKLNFKQ                    | 151 |
| <i>S. margrebowiei</i> _VDP37047 | HIKMIYAKLLYAFTMPKSSYYVYNEIMRSINCHNECMSKQPRLLKKWLKRRNFLQNVNTIVRP..NTDKLNFKQ                    | 152 |
| <i>S. mattheei</i> _VDP61556     | HIKMIYAKLLYAFTMPKSSYYVYNEIMRSINCHNECMSKQPRLLKKWLKRRNFLQNVNTIVRP.....                          | 123 |
| <i>S. japonicum</i> _AAW25535    | HIKMTYAKLLYAFTMPKSSYYVYNEIMRSINCHNECMSKQPRLLKKWSKRHHFLQNVNPILLS....KSTTTE                     | 143 |
| <i>F. gigantica</i> _TPP64183    | KAKDSYGRLLYAFTLLHKTSPKAYKQLINAVGLWDACKFREKKLLNIRMEAPLTWLLNVPKQK.....INPVY                     | 143 |
| <i>F. hepatica</i> _THD24767     | KAKDSYGRLLYAFTLLHKTSPKAYKQLINAVGLWDACKFREKKLLNIRMEAPLTWLLNVPKQK.....INPGY                     | 143 |
| <i>E. caproni</i> _VDP72327      | AAKDSYGRLLYAFTLLHMTSPRAYQQLSNAMTLWDMCKSKGQQTGGSKPEAALSWLFNVPVKP.....ARPSY                     | 141 |
| <i>O. felineus</i> _TGZ61379     | .DKLAYDQILVAFIAMHDYHPVYVLRMLRAIRDWNRGRASSGGVQ.....                                            | 129 |
| <i>O. viverrini</i> _XP009166596 | .DKLAYDQILVAFIAMHDYHPVYVLRMLRAIRDWNRGRASSGLQ.....                                             | 97  |

☐ non conserved  
☒ ≥ 50% conserved  
☒ ≥ 80% conserved

## References:

Kumar, S., et al. (2018). "MEGA X: Molecular Evolutionary Genetics Analysis across Computing Platforms." *Mol Biol Evol* **35**(6): 1547-1549.

The Molecular Evolutionary Genetics Analysis (Mega) software implements many analytical methods and tools for phylogenomics and phylomedicine. Here, we report a transformation of Mega to enable cross-platform use on Microsoft Windows and Linux operating systems. Mega X does not require virtualization or emulation software and provides a uniform user experience across platforms. Mega X has additionally been upgraded to use multiple computing cores for many molecular evolutionary analyses. Mega X is available in two interfaces (graphical and command line) and can be downloaded from [www.megasoftware.net](http://www.megasoftware.net) free of charge.

Crooks GE, Hon G, Chandonia JM, Brenner SE WebLogo: A sequence logo generator, *Genome Research*, 14:1188-1190, (2004)
